# Supplementary material
Source: HighWire-hosted journal article supplement (https://www.jrheum.org/highwire/filestream/29814/field_highwire_adjunct_files/0/160012DataSuppl.pdf)
Supplement: 160012DataSuppl.pdf [file 160012DataSuppl.pdf]

## ONLINE SUPPLEMENTARY DATA

**Supplementary Table 1. Changes in disease activity in each group**

|                                          |                                  | total     | young     | elderly   | old elderly |
|------------------------------------------|----------------------------------|-----------|-----------|-----------|-------------|
| All patients                             | N                                | 309       | 174       | 86        | 49          |
|                                          | DAS28ESR at 0w                   | 4.9 ± 4.9 | 4.7 ± 1.4 | 5.2 ± 1.3 | 5.2 ± 1.5   |
|                                          | DAS28ESR at the last observation | 3.3 ± 1.8 | 3.0 ± 1.7 | 3.5 ± 1.8 | 3.8 ± 1.7   |
|                                          | p value                          | <0.0001   | <0.0001   | <0.0001   | <0.0001     |
|                                          | Observation period (weeks)       |           | 67.0      | 58.8      | 64.8        |
| Patients with discontinuation due to AEs | N                                | 37        | 13        | 14        | 10          |
|                                          | DAS28ESR at 0w                   | 4.8 ± 1.6 | 4.4 ± 1.5 | 5.1 ± 1.5 | 4.9 ± 2.0   |
|                                          | DAS28ESR at the last observation | 3.6 ± 1.8 | 3.1 ± 1.5 | 3.8 ± 2.1 | 4.2 ± 1.7   |
|                                          | p value                          | 0.001     | 0.03      | 0.02      | 0.37        |
|                                          | Observation period (weeks)       |           | 30.3      | 18.8      | 35.2        |

DAS28, disease activity score for 28 joints; AE, adverse events

**Supplementary Table 2. All adverse events in each groups**

|                              | Young<br>N = 174     | Elderly<br>N = 86                  | Old elderly<br>N = 49                                                    |
|------------------------------|----------------------|------------------------------------|--------------------------------------------------------------------------|
| 1,000 patients per year      | 53                   | 154                                | 164                                                                      |
| Death                        | 0                    | 2<br>(Unknown causes)              | 0                                                                        |
| Infusion reaction            | 5                    | 3                                  | 1                                                                        |
| Local injection reaction     | 1                    | 0                                  | 2                                                                        |
| Infection                    | 1 (Nail candidiasis) | 2 (Bronchitis, PCP)                | 2 (Arthritis purulenta,<br>Bacterial pneumonia)                          |
| Malignancy                   | 1 (Lung cancer)      | 1 (Lung cancer)                    | 0                                                                        |
| Thrombocytopenia             | 1                    | 0                                  | 0                                                                        |
| Transaminase increase        | 2                    | 1                                  | 0                                                                        |
| Renal function impairment    | 0                    | 1                                  | 0                                                                        |
| Cerebro-cardiovascular event | 0                    | 0                                  | 3 (Cerebral infarction,<br>Subcortical hemorrhage,<br>Aortic dissection) |
| Fracture                     | 0                    | 2                                  | 0                                                                        |
| Others                       | 1 (Skin rash)        | 3 (Psoriasis, Cough,<br>Skin rash) | 2 (Ileus, Vertigo)                                                       |

PCP, *Pneumocystis jirovecii*

**Supplementary Table 3. Comparison between elderly/old elderly patients with biologics and those without**

|            |                               | Biologics (n=135)                                                          | DMARDs (n=135)                       | p value*        |
|------------|-------------------------------|----------------------------------------------------------------------------|--------------------------------------|-----------------|
|            | Age (years old)               | 72.8 ± 5.1                                                                 | 73.8 ± 6.5                           | 0.18            |
|            | disease duration (weeks)      | 528.9 ± 647.9                                                              | 536.6 ± 524.0                        | 0.91            |
|            | DAS28ESR                      | 5.2 ± 1.4                                                                  | 3.3 ± 1.4                            | <b>&lt;0.01</b> |
|            | HAQ-DI                        | 1.3 ± 0.9                                                                  | 0.6 ± 0.8                            | <b>&lt;0.01</b> |
| Background | Current smoking n (%)         | 75 (25.1)                                                                  | 23 (31.5)                            | 0.27            |
|            | PSL usage n (%)               | 48 (35.6)                                                                  | 20 (14.8)                            | <b>&lt;0.01</b> |
|            | Complications n (%)           |                                                                            |                                      |                 |
|            | Pulmonary diseases n (%)      | 33 (24.4)                                                                  | 17 (12.6)                            | <b>0.02</b>     |
|            | Cardiovascular diseases n (%) | 17 (12.6)                                                                  | 8 (5.9)                              | 0.09            |
|            | Renal function (eGFR)         | 71.2 ± 21.7                                                                | 64.9 ± 16.2                          | <b>&lt;0.01</b> |
|            | Total n (%)                   | 20 (14.8)                                                                  | 10 (7.4)                             | 0.08            |
| AEs        | Death                         | 2<br>(2 unknown causes)                                                    | 2<br>(1 breast cancer,<br>1 unknown) |                 |
|            | Infection                     | 4<br><br>(bronchitis, PCP, Arthritis<br>purulenta, bacterial<br>pneumonia) |                                      |                 |

|                              |                                                                              |                                                   |
|------------------------------|------------------------------------------------------------------------------|---------------------------------------------------|
| Malignancy                   | 2<br>(lung cancer,<br>breast cancer)                                         | 6<br>(3 lung cancer,<br>3 breast cancer)          |
| Transaminase increase        | 1                                                                            | 0                                                 |
| Renal function impairment    | 1                                                                            | 0                                                 |
| Cerebro-cardiovascular event | 3<br>(cerebral infarction,<br>subcortical hemorrhage,<br>aortic dissection ) | 2<br>(cerebral infarction,<br>cardiac infarction) |
| Fracture                     | 2                                                                            | 0                                                 |
| Others                       | 5<br>(PsA, cough, skin rash,<br>ileus, vertigo)                              | 0                                                 |

---

PCP, *Pneumocystis jirovecii*
